# Supplementary material
Source: publisher figshare collection journal article supplement (https://frontiersin.figshare.com/ndownloader/files/12498374)
Supplement: Supplementary file [file 12498374]

**SUPPLEMENTARY MATERIAL**

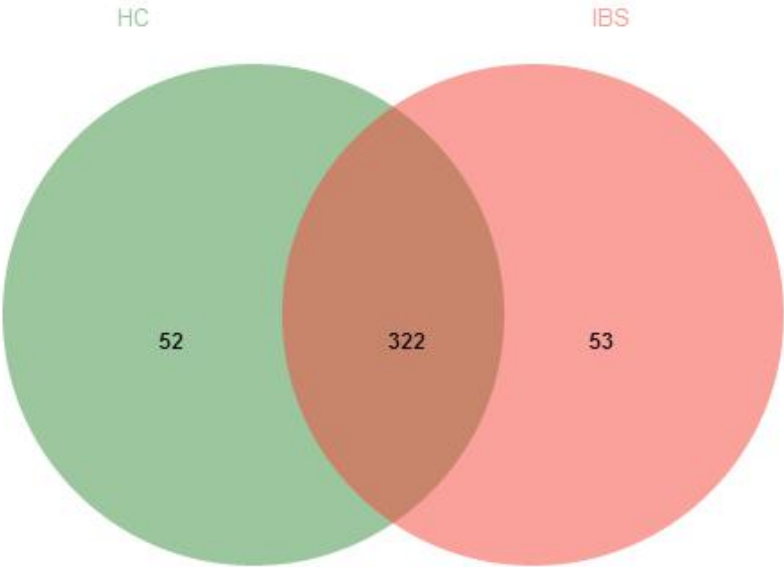

**Figures S1** | Venn diagram illustrating overlap of OTUs in fecal microbiota between IBS-D patients and HCs.

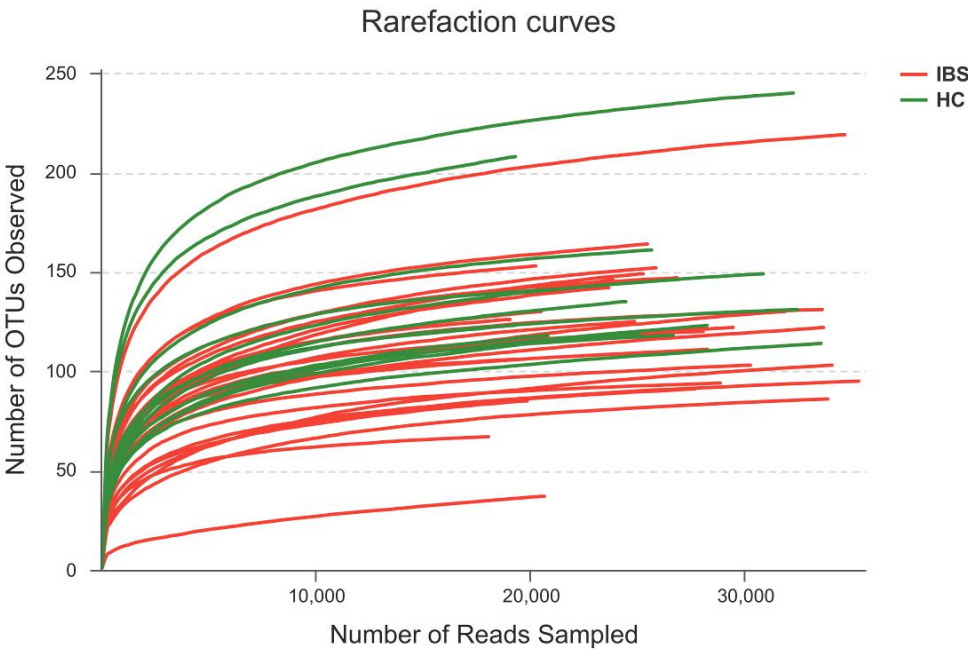

**Figures S2** | Rarefaction curves of 40 samples from IBS-D patients and HCs.

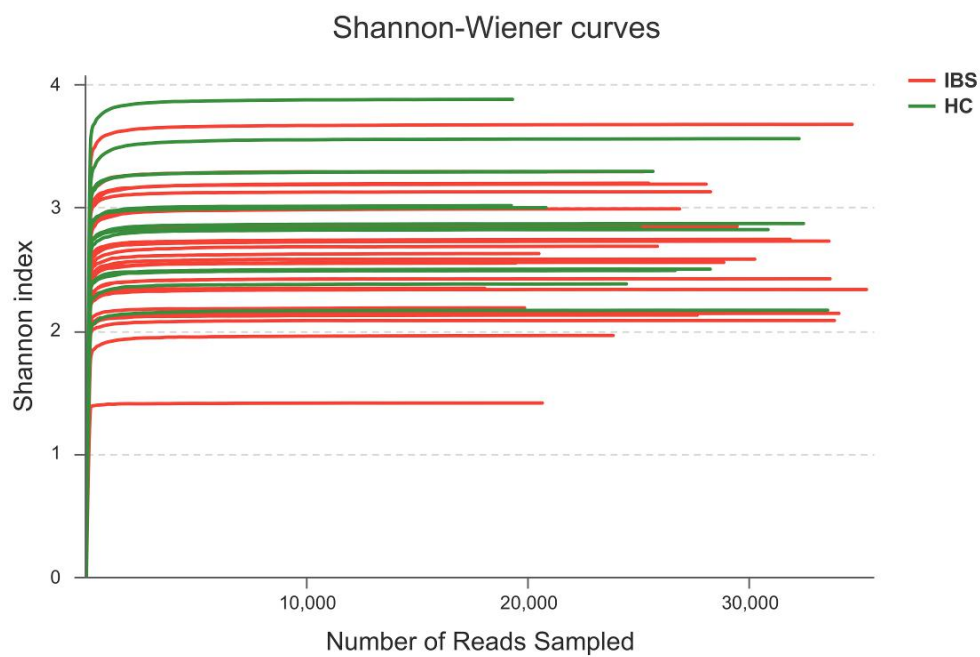

**Figures S3** | Shannon–Wiener curves of 40 samples from IBS-D patients and HCs.

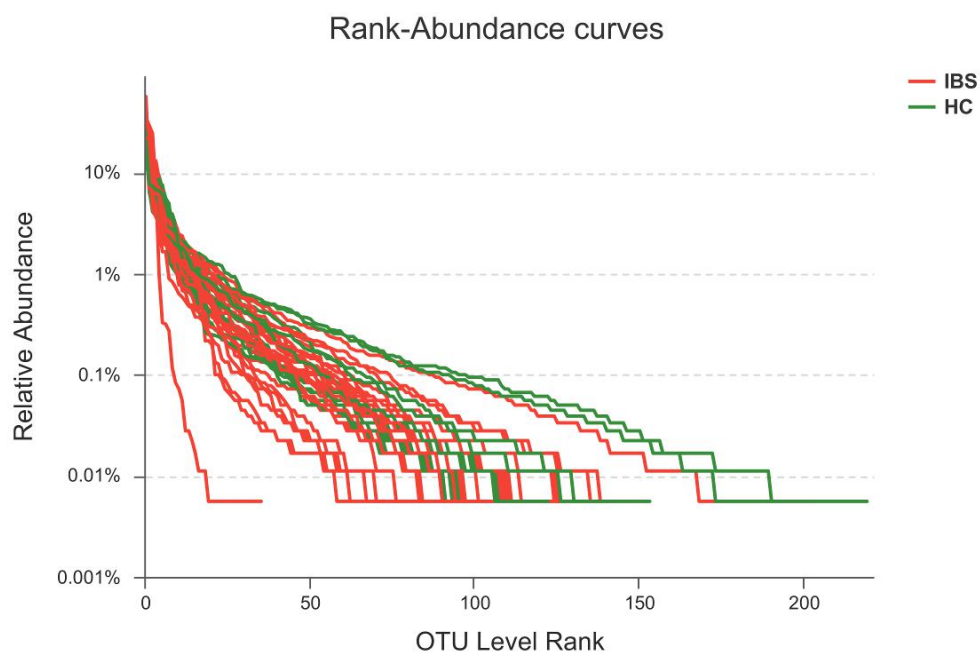

**Figures S4** | Rank-abundance curves of 40 samples from IBS-D patients and HCs.

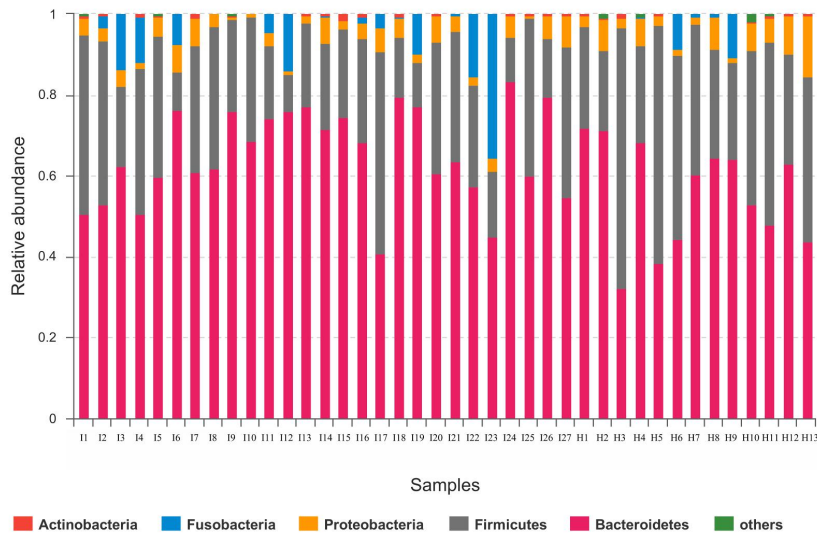

**Figures S5** | Relative abundance of fecal microbiota community at the phylum levels from IBS-D patients and HCs.

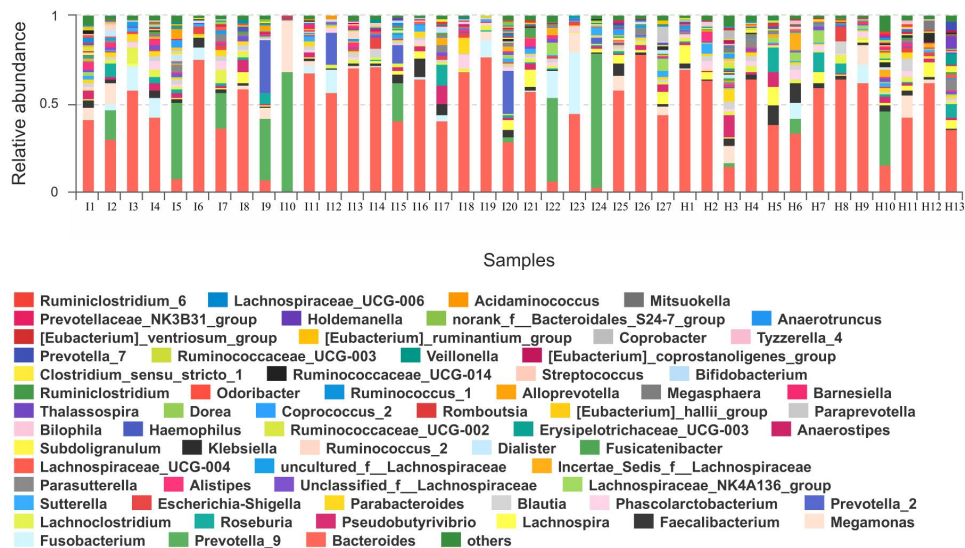

**Figures S6** | Relative abundance of fecal microbiota community at the genus levels from IBS-D patients and HCs.

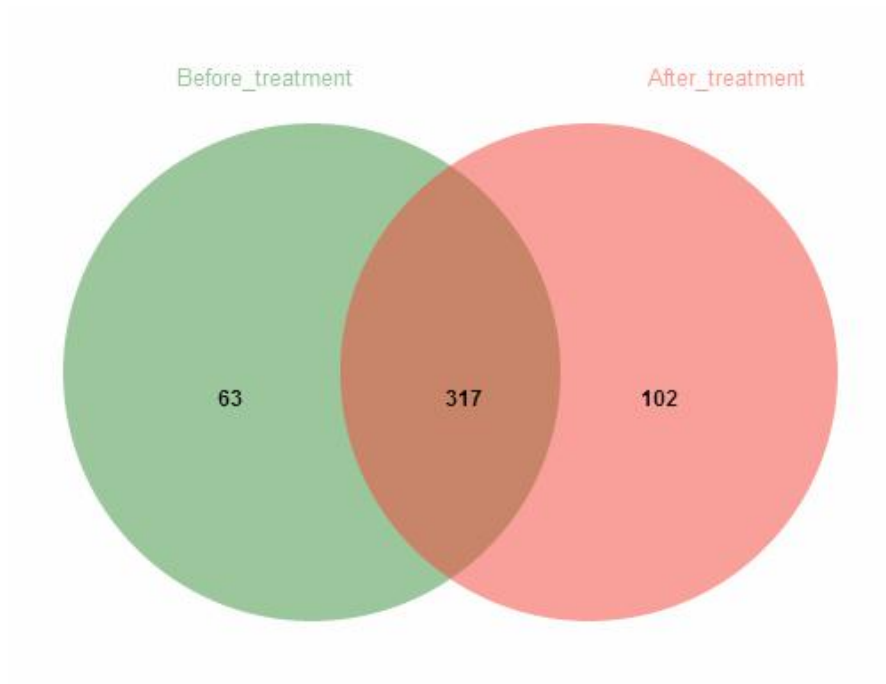

**Figures S7** | Venn diagram illustrating overlap of OTUs in fecal microbiota from IBS-D patients before and after rifaximin treatment.

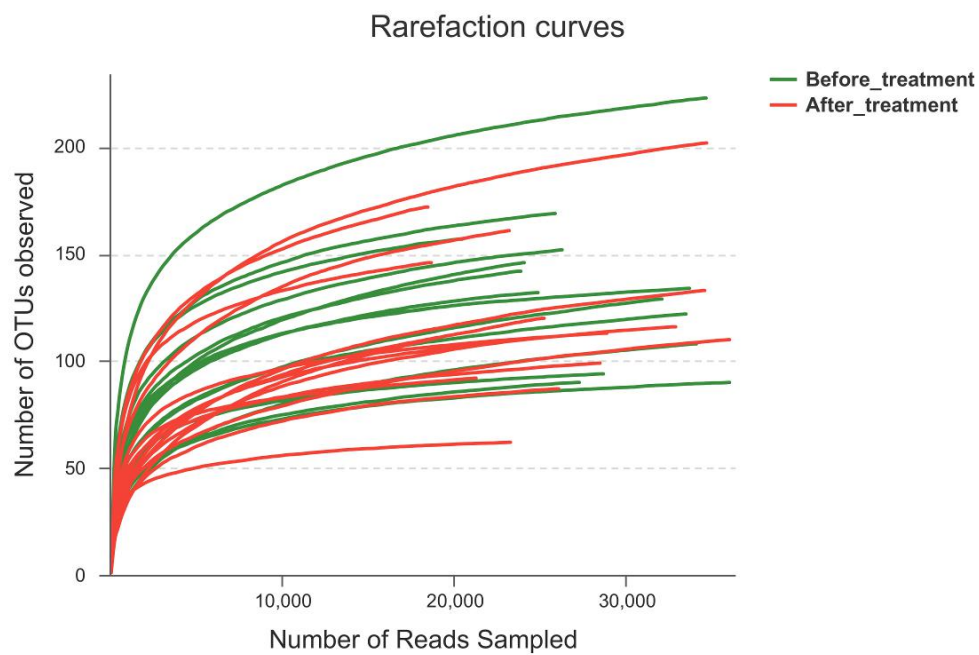

**Figures S8** | Rarefaction curves of 30 samples from IBS-D patients before and after rifaximin

treatment.

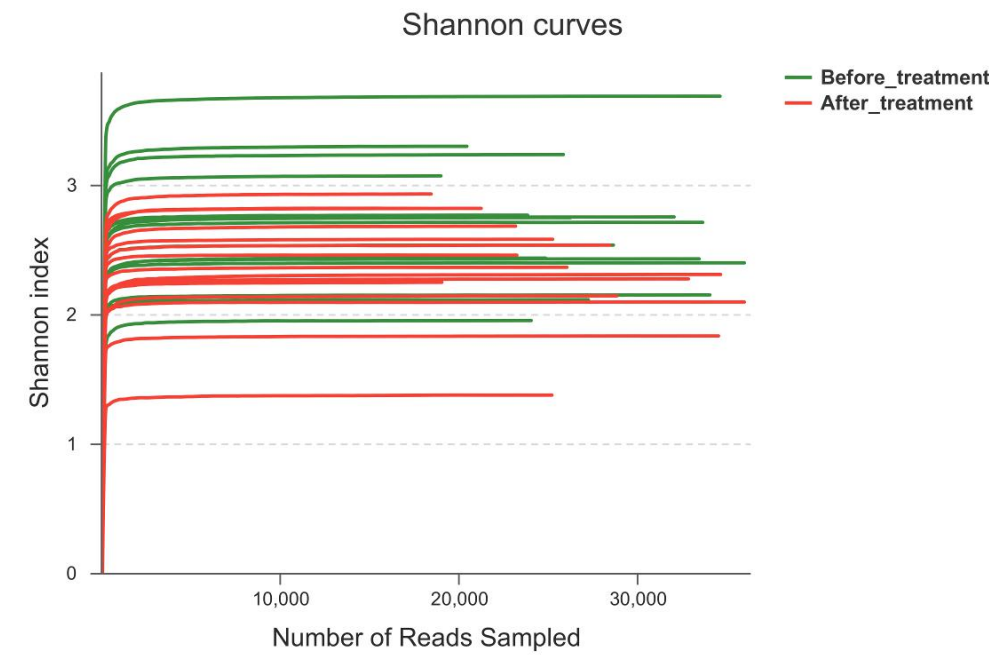

**Figures S9** | Shannon–Wiener curves of 30 samples from IBS-D patients before and after rifaximin treatment.

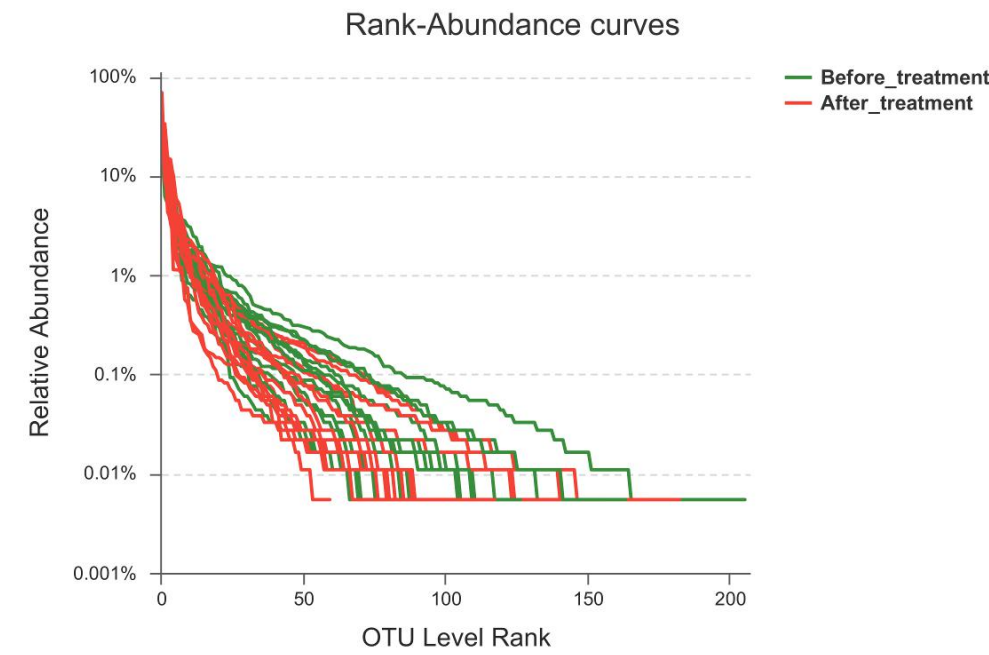

**Figures S10** | Rank-abundance curves of 30 samples in IBS-D patients before and after rifaximin treatment.

**Table S1** | Comparison of relative abundance at phyla level in IBS-D patients before and after rifaximin treatment

| Species name                          | After_treatment-Mean(%) | After_treatment-Sd(%) | Before_treatment-Mean(%) | Before_treatment-Sd(%) | P value  |
|---------------------------------------|-------------------------|-----------------------|--------------------------|------------------------|----------|
| g__Butyricimonas                      | 0.07366                 | 0.1186                | 0.2303                   | 0.285                  | 0.03106  |
| g__[Eubacterium]_ventriosum_group     | 0.01525                 | 0.02511               | 0.08013                  | 0.09842                | 0.03205  |
| g__Anaerotruncus                      | 0.02946                 | 0.07705               | 0.05502                  | 0.1074                 | 0.00893  |
| g__Tyzzerella                         | 0.007077                | 0.02741               | 0.03807                  | 0.09504                | 0.02196  |
| g__Kocuria                            | 0.01611                 | 0.04067               | 0                        | 0                      | 0.0181   |
| g__Arthrobacter                       | 0.01405                 | 0.02549               | 0.0002822                | 0.001093               | 0.01227  |
| g__Family_XIII_UCG-001                | 0.001085                | 0.004203              | 0.01086                  | 0.0252                 | 0.04401  |
| g__norank_f__Bacillaceae              | 0.01123                 | 0.0328                | 0                        | 0                      | 0.03841  |
| g__[Eubacterium]_oxidoreducens_group  | 0.0019                  | 0.002217              | 0.008289                 | 0.008392               | 0.034    |
| g__Devosia                            | 0.007135                | 0.00843               | 0.0005183                | 0.002007               | 0.004173 |
| g__uncultured_o__Frankiales           | 0.007264                | 0.01552               | 0                        | 0                      | 0.003625 |
| g__norank_f__MNC12                    | 0.007128                | 0.01666               | 0                        | 0                      | 0.0181   |
| g__unclassified_f__Erythrobacteraceae | 0.007076                | 0.009417              | 0                        | 0                      | 0.008258 |
| g__Sphingomonas                       | 0.006631                | 0.01148               | 0.000209                 | 0.0008096              | 0.004899 |
| g__uncultured_o__Acidimicrobiales     | 0.006554                | 0.01058               | 0                        | 0                      | 0.008258 |
| g__unclassified_f__Phyllobacteriaceae | 0.006158                | 0.007919              | 0                        | 0                      | 0.001523 |
| g__Truepera                           | 0.005932                | 0.01087               | 0                        | 0                      | 0.03841  |
| g__Nocardioides                       | 0.005762                | 0.01162               | 0                        | 0                      | 0.008258 |
| g__Peptococcus                        | 0                       | 0                     | 0.005605                 | 0.01073                | 0.03841  |
| g__unclassified_f__Microbacteriaceae  | 0.005537                | 0.01097               | 0                        | 0                      | 0.0181   |
| g__Pontibacter                        | 0.004462                | 0.006643              | 0                        | 0                      | 0.008258 |
| g__Streptomyces                       | 0.003947                | 0.006464              | 0.0002591                | 0.001004               | 0.01227  |
| g__Rhizobium                          | 0.003846                | 0.009024              | 0                        | 0                      | 0.03841  |

|                           |          |          |   |   |          |
|---------------------------|----------|----------|---|---|----------|
| g__Nitriliruptor          | 0.003648 | 0.005289 | 0 | 0 | 0.003625 |
| g__norank_c__Gitt-GS-136  | 0.003574 | 0.008006 | 0 | 0 | 0.0181   |
| g__norank_o__Subgroup_6   | 0.002741 | 0.00574  | 0 | 0 | 0.03841  |
| g__Prevotellaceae_UCG-001 | 0.002343 | 0.006207 | 0 | 0 | 0.03841  |
| g__Asanoa                 | 0.001548 | 0.002668 | 0 | 0 | 0.0181   |
